# Supplementary material for: Symmetrical polyhedron-bowl Co/CoO with hexagonal plate to forward electromagnetic wave absorption ability
Source: Royal Society of Chemistry journal article supplement (doi:10.1039/c8ce01677a), 2018-11-30
Supplement: c8ce01677a1.pdf [file c8ce01677a1.pdf]

## **Symmetrical polyhedron-bowl Co/CoO with hexagonal plate to forward electromagnetic wave absorption ability**

Biao Zhao,<sup>a, b, \*</sup> Yang Li,<sup>c</sup> Junwei Liu,<sup>a</sup> Lei Fan,<sup>a</sup> Ka Gao,<sup>a</sup> Zhongyi Bai,<sup>a</sup> Luyang Liang,<sup>c</sup> Xiaoqin Guo,<sup>a</sup> Rui Zhang,<sup>a, c, \*</sup>

<sup>a</sup> Henan Key Laboratory of Aeronautical Materials and Application Technology, School of Material Science and Engineering, Zhengzhou University of Aeronautics, Zhengzhou, Henan 450046, China

<sup>b</sup> Department of Mechanical and Industrial Engineering, University of Toronto, 5 King's College Road, Toronto, Ontario M5S 3G8, Canada

<sup>c</sup> School of Material Science and Engineering, Zhengzhou University, Zhengzhou, Henan 450001, China

**\* Corresponding Author:**

Dr. Biao Zhao

E-mail address: biao\_zhao@zua.edu.cn

Prof. Rui Zhang

E-mail address: zhangray@zua.edu.cn

Tel: +86-371-60632007

Fax: +86-371-60632600

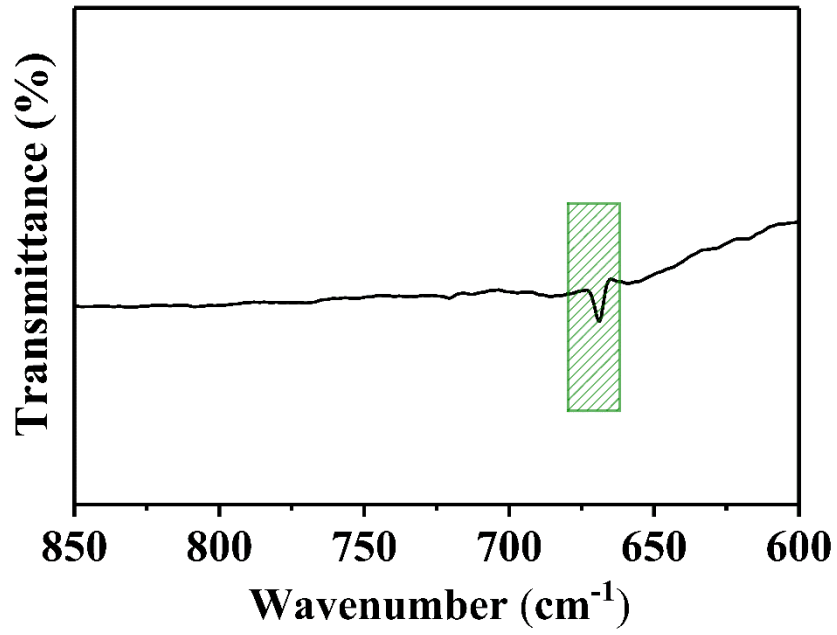

Figure S1 The FT-IR spectrum of the symmetrical polyhedron-bowl Co polyhedrons

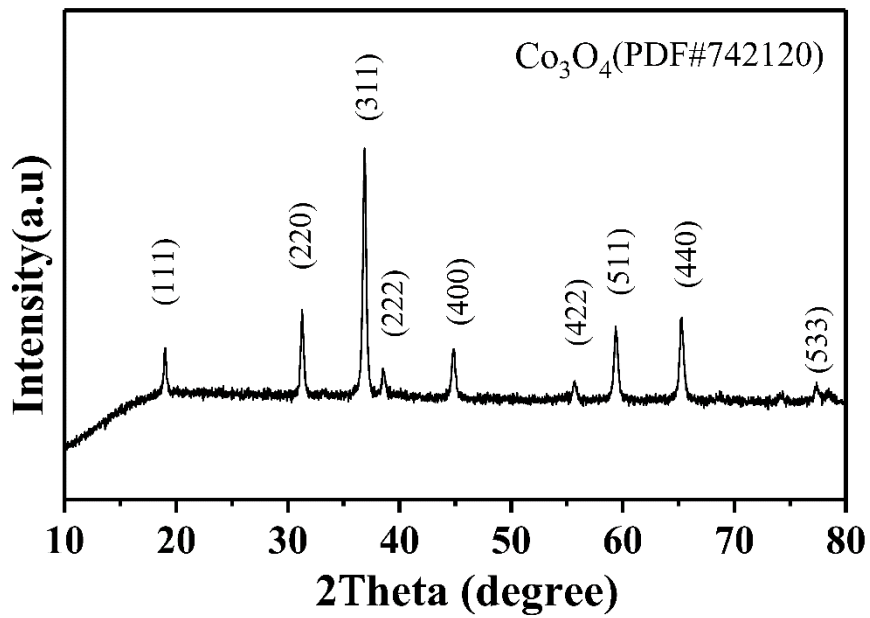

Figure S2 XRD curve of the products after TGA analysis

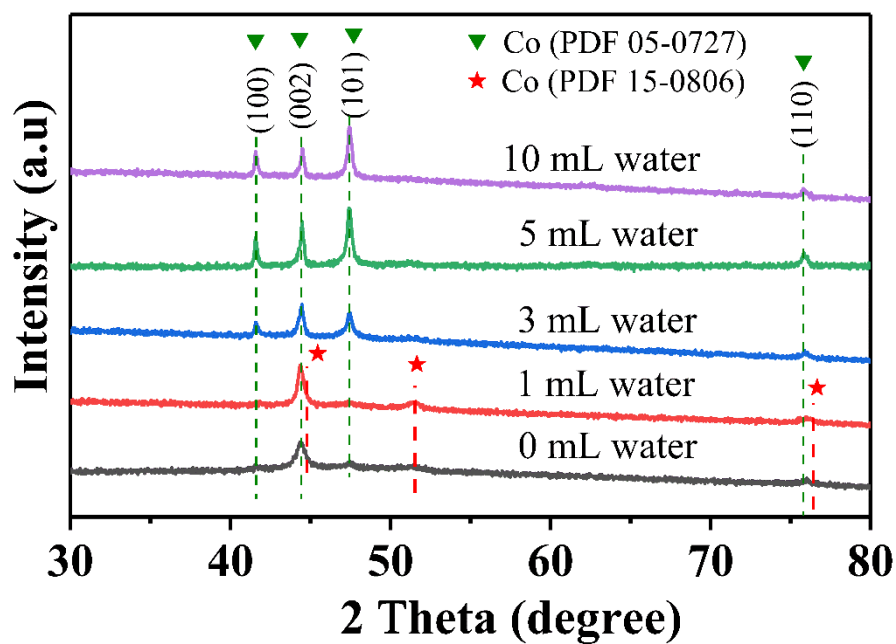

Figure S3 XRD profiles of Co samples prepared at various contents of distilled water (0 mL, 1 mL, 3 mL, 5 mL and 10 mL).

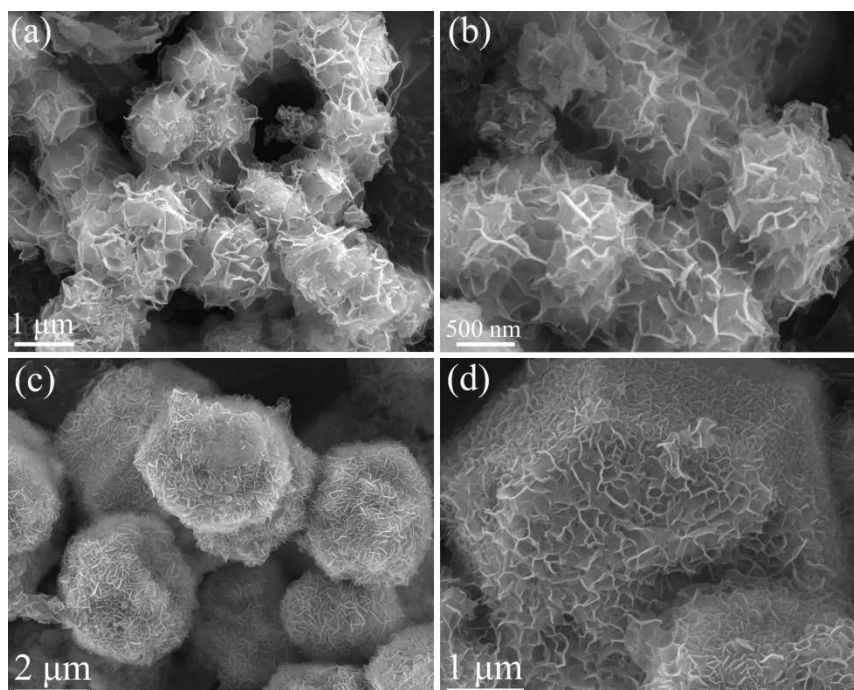

Figure S4 (a, b) SEM images of products prepared with  $\text{CoC}_2\text{O}_4$  as Co source; (c, d) SEM images of products prepared with  $\text{Co}(\text{NO}_3)_2$  as Co source.

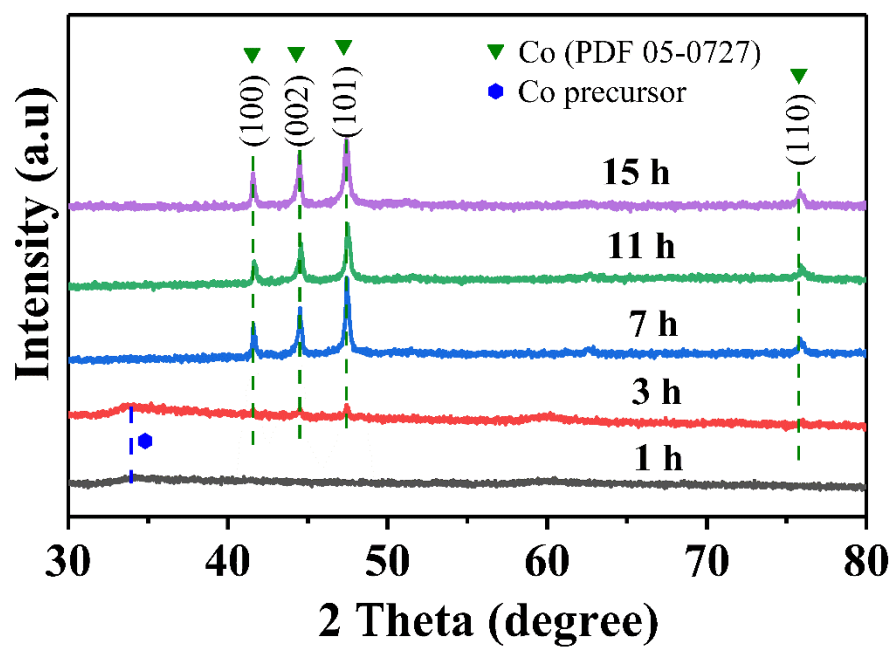

Figure S5 XRD patterns of products prepared at different reaction times (1 h, 3 h, 7 h, 11 h and 15 h).

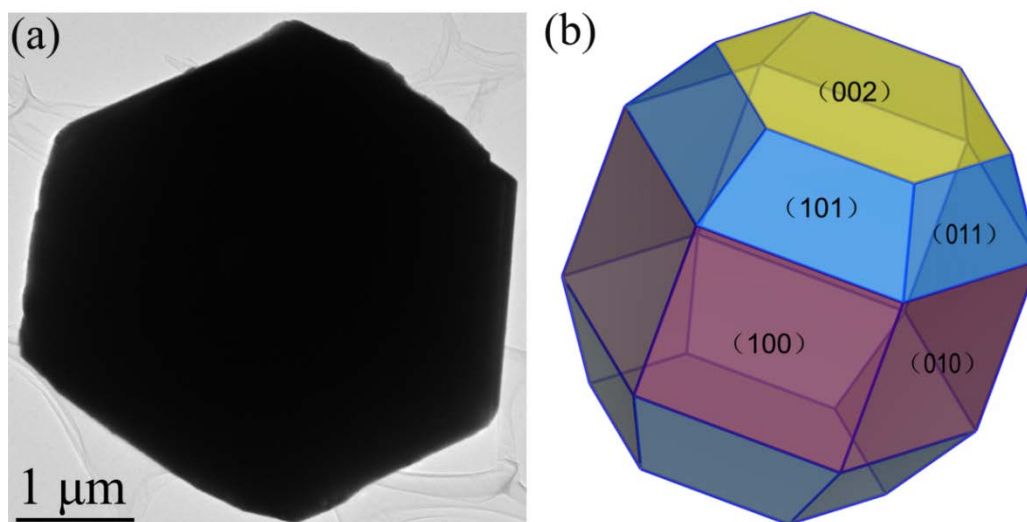

Figure S6 (a) TEM image, and (b) an illustration of growth mechanism of the symmetrical polyhedron-bowl Co polyhedrons.

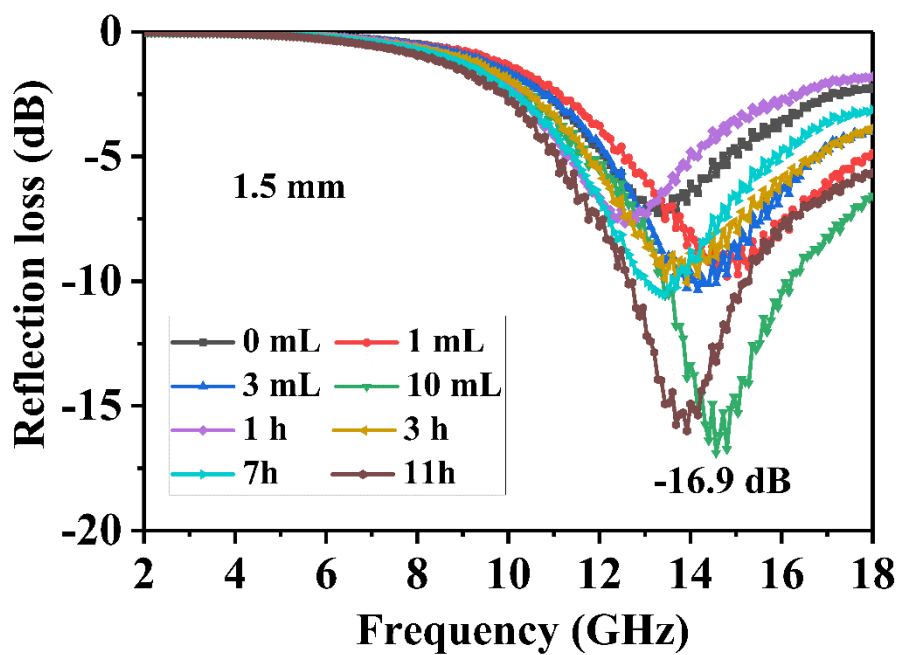

Figure S7 Microwave absorption properties of paraffin/50 wt% Co based products with different shapes prepared at various distilled water contents and temperatures.

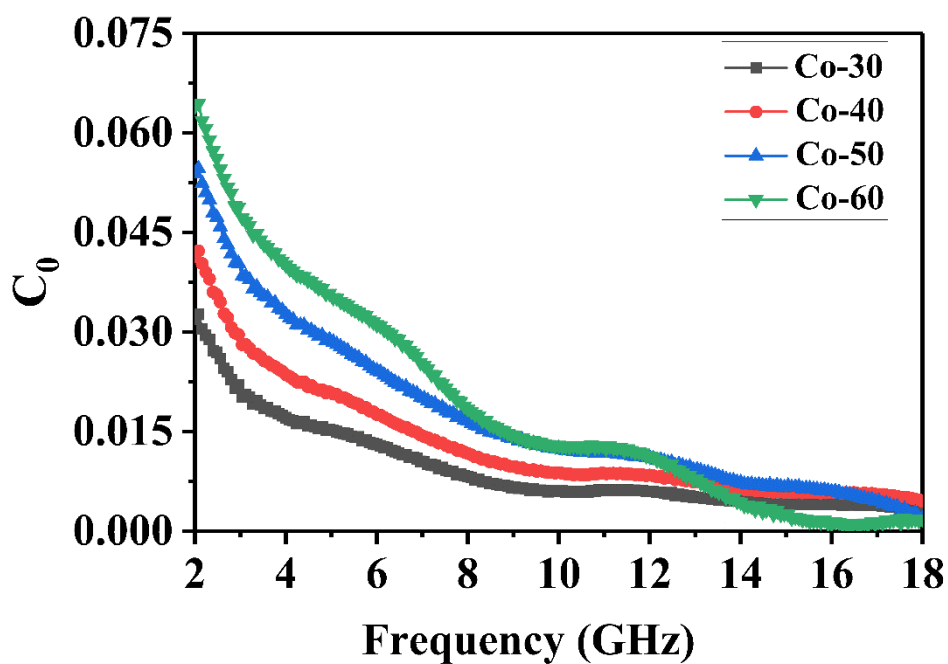

Figure S8 The  $C_0$  [ $\mu''(\mu')^{-2}f^{-1}$ ] values of the symmetrical polyhedron-bowl Co/CoO paraffin composites as a function of the frequency.
